# Supplementary material for: General anaesthesia: from molecular targets to neuronal pathways of sleep and arousal
Source: Springer Nature journal article supplement (doi:10.1038/nrn2372), 2008-04-18
Supplement: 41583_2008_BFnrn2372_MOESM1_ESM.pdf [file 41583_2008_BFnrn2372_MOESM1_ESM.pdf]

S1 | Free aqueous concentrations for human loss of consciousness and rodent loss of righting reflex\*

| Molecular Weight                                                                                            | Mouse or rat LORR <sup>‡</sup>     | Human loss of consciousness <sup>§</sup> | Ostwald coefficient at 37°C (for gas/buffer) <sup>  </sup> | Protein binding or partition data                     | Rodent concentration for LORR (mM) | Human concentration for LOC (mM) |
|-------------------------------------------------------------------------------------------------------------|------------------------------------|------------------------------------------|------------------------------------------------------------|-------------------------------------------------------|------------------------------------|----------------------------------|
| <b>Nitrous oxide (N<sub>2</sub>O; N#[N+][O-])</b>                                                           |                                    |                                          |                                                            |                                                       |                                    |                                  |
| 44.01                                                                                                       | 1.18 atm <sup>1</sup>              | 0.650 atm <sup>2</sup>                   | 0.47 <sup>3</sup> ×0.94 <sup>14</sup>                      |                                                       | 20.5                               | 11.3                             |
| <b>Cyclopropane (C<sub>3</sub>H<sub>6</sub>; C1CC1)</b>                                                     |                                    |                                          |                                                            |                                                       |                                    |                                  |
| 42.08                                                                                                       | 0.151 atm <sup>1</sup>             | 0.07 atm <sup>5,6</sup>                  | 0.21 <sup>3</sup> ×0.94 <sup>14</sup>                      |                                                       | 1.17                               | 0.54                             |
| <b>Xenon (Xe; [Xe])</b>                                                                                     |                                    |                                          |                                                            |                                                       |                                    |                                  |
| 131.29                                                                                                      | 0.95 atm <sup>2</sup>              | 0.33 atm <sup>7</sup>                    | 0.085 <sup>12</sup> ×0.94 <sup>14</sup>                    |                                                       | 2.98                               | 1.04                             |
| <b>Desflurane (C<sub>3</sub>H<sub>2</sub>F<sub>6</sub>O; C(C(F)(F)F)(OC(F)F)F)</b>                          |                                    |                                          |                                                            |                                                       |                                    |                                  |
| 168.04                                                                                                      | 0.0733 atm <sup>9</sup>            | 0.0251 atm <sup>2</sup>                  | 0.225 <sup>10</sup>                                        |                                                       | 0.648                              | 0.222                            |
| <b>Sevoflurane (C<sub>4</sub>H<sub>3</sub>F<sub>7</sub>O; C(OC(C(F)(F)F)C(F)(F)F)F)</b>                     |                                    |                                          |                                                            |                                                       |                                    |                                  |
| 200.05                                                                                                      | 0.020 atm <sup>9,11</sup>          | 0.00648 atm <sup>2</sup>                 | 0.370 <sup>12</sup>                                        |                                                       | 0.291                              | 0.094                            |
| <b>Isoflurane (C<sub>3</sub>H<sub>2</sub>ClF<sub>5</sub>O; C(C(F)(F)F)(OC(F)F)Cl)</b>                       |                                    |                                          |                                                            |                                                       |                                    |                                  |
| 184.49                                                                                                      | 0.0060 atm <sup>11,13</sup>        | 0.00414 atm <sup>2</sup>                 | 0.534 <sup>8</sup>                                         |                                                       | 0.126                              | 0.087                            |
| <b>Halothane (C<sub>2</sub>HBrClF<sub>3</sub>; C(C(F)(F)F)(Cl)Br)</b>                                       |                                    |                                          |                                                            |                                                       |                                    |                                  |
| 197.38                                                                                                      | 0.0075 atm <sup>9,11,13</sup>      | 0.0041 atm <sup>2</sup>                  | 0.659 <sup>8</sup>                                         |                                                       | 0.194                              | 0.106                            |
| <b>Thiopental (C<sub>11</sub>H<sub>18</sub>N<sub>2</sub>O<sub>2</sub>S; CCCC(C)C1(C(=O)NC(=S)NC1=O)CC)</b>  |                                    |                                          |                                                            |                                                       |                                    |                                  |
| 242.34                                                                                                      | 15.9 mg/ml in plasma <sup>14</sup> | 15.6 mg/ml in serum <sup>15</sup>        |                                                            | 85% protein binding <sup>16</sup>                     | 0.0099                             | 0.0097                           |
| <b>Propofol (C<sub>12</sub>H<sub>18</sub>O; CC(C)C1=C(C(=CC=C1)C(C)C)O)</b>                                 |                                    |                                          |                                                            |                                                       |                                    |                                  |
| 178.27                                                                                                      | 3.8 mg/ml in blood <sup>17</sup>   | 3.0 mg/ml in blood <sup>18,19</sup>      |                                                            | 97.8% protein binding <sup>20</sup>                   | 0.00047                            | 0.00037                          |
| <b>Etomidate (C<sub>14</sub>H<sub>16</sub>N<sub>2</sub>O<sub>2</sub>; CCOC(=O)C1=CN=CN1C(C)C2=CC=CC=C2)</b> |                                    |                                          |                                                            |                                                       |                                    |                                  |
| 244.29                                                                                                      | 0.44 mg/ml in plasma <sup>21</sup> | 0.25 mg/ml plasma <sup>22–24</sup>       |                                                            | Plasma/buffer partition coefficient 4.3 <sup>25</sup> | 0.0018                             | 0.001                            |

\*Compound followed by molecular formula and SMILES notation in brackets. †No distinction is made between provoked, and unprovoked, loss of righting reflex. ‡Failure to respond to a verbal command. ||In some cases, Ostwald coefficients have been calculated from literature values for Bunsen coefficients using the relationship: Ostwald coefficient = Bunsen coefficient × 1.13546. ††This reduction of 6% accounts for the reduced solubility of anaesthetics in physiological saline solution compared to pure water according to reference 4.

- Smith, R. A., Winter, P. M., Smith, M. & Eger, E. I. Rapidly developing tolerance to acute exposures to anesthetic agents. *Anesthesiology* **50**, 496–500 (1979).
- Eger, E. I. Age, minimum alveolar anesthetic concentration, and minimum alveolar anesthetic concentration-awake. *Anesth. Analg.* **93**, 947–953 (2001).
- Halsey, M. J. in *General Anaesthesia*, Vol. 1 (eds Gray, T. C., Nunn, J. F. & Utting, J. E.) (Butterworths, London, 1985).
- Steward, A., Allott, P. R., Cowles, A. L. & Mapleson, W. W. Solubility coefficients for inhaled anaesthetics for water, oil and biological media. *Br. J. Anaesth.* **45**, 282–293 (1973).
- SeEVERS, M. H., BENNETT, J. H., POHLE, H. W. & REINARDY, E. W. The analgesia produced by nitrous oxide, ethylene and cyclopropane in the normal human subject. *J. Pharm. Exp. Ther.* **59**, 291–300 (1937).
- Marshall, S. V. & Daly, H. J. Cyclopropane anesthesia. *Anesth. Analg.* **17**, 324–331 (1938).
- Goto, T. *et al.* Minimum alveolar concentration-awake of Xenon alone and in combination with isoflurane or sevoflurane. *Anesthesiology* **93**, 1188–1193 (2000).
- Smith, R. A., Porter, E. G. & Miller, K. W. The solubility of anesthetic gases in lipid bilayers. *Biochim. Biophys. Acta* **645**, 327–338 (1981).
- Heurteaux, C. *et al.* TREK-1, a K<sup>+</sup> channel involved in neuroprotection and general anesthesia. *EMBO J.* **23**, 2684–2695 (2004).
- Eger, E. I. Partition coefficients of I-653 in human blood, saline, and olive oil. *Anesth. Analg.* **66**, 971–973 (1987).
- Joo, D. T. *et al.* Blockade of AMPA receptors and volatile anesthetics: reduced anesthetic requirements in GluR2 null mutant mice for loss of the righting reflex and antinociception but not minimum alveolar concentration. *Anesthesiology* **94**, 478–488 (2001).
- Strum, D. P. & Eger, E. I. Partition coefficients for sevoflurane in human blood, saline, and olive oil. *Anesth. Analg.* **66**, 654–656 (1987).
- Sonner, J. M. *et al.* Effect of isoflurane and other potent inhaled anesthetics on minimum alveolar concentration, learning, and the righting reflex in mice engineered to express α1 γ-aminobutyric acid type A receptors unresponsive to isoflurane. *Anesthesiology* **106**, 107–113 (2007).
- Gustafsson, L. L., Ebling, W. F., Osaki, E. & Stanski, D. R. Quantitation of depth of thiopental anesthesia in the rat. *Anesthesiology* **84**, 415–427 (1996).
- Hung, O. R., Varvel, J. R., Shafer, S. L. & Stanski, D. R. Thiopental pharmacodynamics. II. Quantitation of clinical and electroencephalographic depth of anesthesia. *Anesthesiology* **77**, 237–244 (1992).
- Burch, P. G. & Stanski, D. R. The role of metabolism and protein binding in thiopental anesthesia. *Anesthesiology* **58**, 146–152 (1983).
- Simons, P. J. *et al.* Distribution in female rats of an anaesthetic intravenous dose of <sup>14</sup>C-propofol. *Xenobiotica* **21**, 1325–1335 (1991).
- Smith, C. *et al.* The interaction of fentanyl on the Cp50 of propofol for loss of consciousness and skin incision. *Anesthesiology* **81**, 820–828; discussion 826A (1994).
- Chortkoff, B. S. *et al.* Concentrations of desflurane and propofol that suppress response to command in humans. *Anesth. Analg.* **81**, 737–743 (1995).
- Servin, F. *et al.* Pharmacokinetics and protein binding of propofol in patients with cirrhosis. *Anesthesiology* **69**, 887–891 (1988).
- De Paepe, P. *et al.* Relationship between etomidate plasma concentration and EEG effect in the rat. *Pharm. Res.* **16**, 924–929 (1999).
- Avram, M. J., Fragen, R. J. & Linde, H. W. High-performance liquid chromatographic assay for etomidate in human plasma: results of preliminary clinical studies using etomidate for hypnosis in total intravenous anesthesia. *J. Pharm. Sci.* **72**, 1424–1426 (1983).
- Fragen, R. J., Avram, M. J., Henthorn, T. K. & Caldwell, N. J. A pharmacokinetically designed etomidate infusion regimen for hypnosis. *Anesth. Analg.* **62**, 654–660 (1983).
- Hebron, B. S., Edbrooke, D. L., Newby, D. M. & Mather, S. J. Pharmacokinetics of etomidate associated with prolonged i.v. infusion. *Br. J. Anaesth.* **55**, 281–287 (1983).
- Meuldermans, W. E. & Heykants, J. J. The plasma protein binding and distribution of etomidate in dog, rat and human blood. *Arch. Int. Pharmacodyn. Ther.* **221**, 150–162 (1976).
